# Supplementary material
Source: PubMed Central journal article supplement (PMC3634695)
Supplement: supp_tpc.112.108902_tpc108902Supplemental.pdf [file supp_tpc.112.108902_tpc108902Supplemental.pdf]

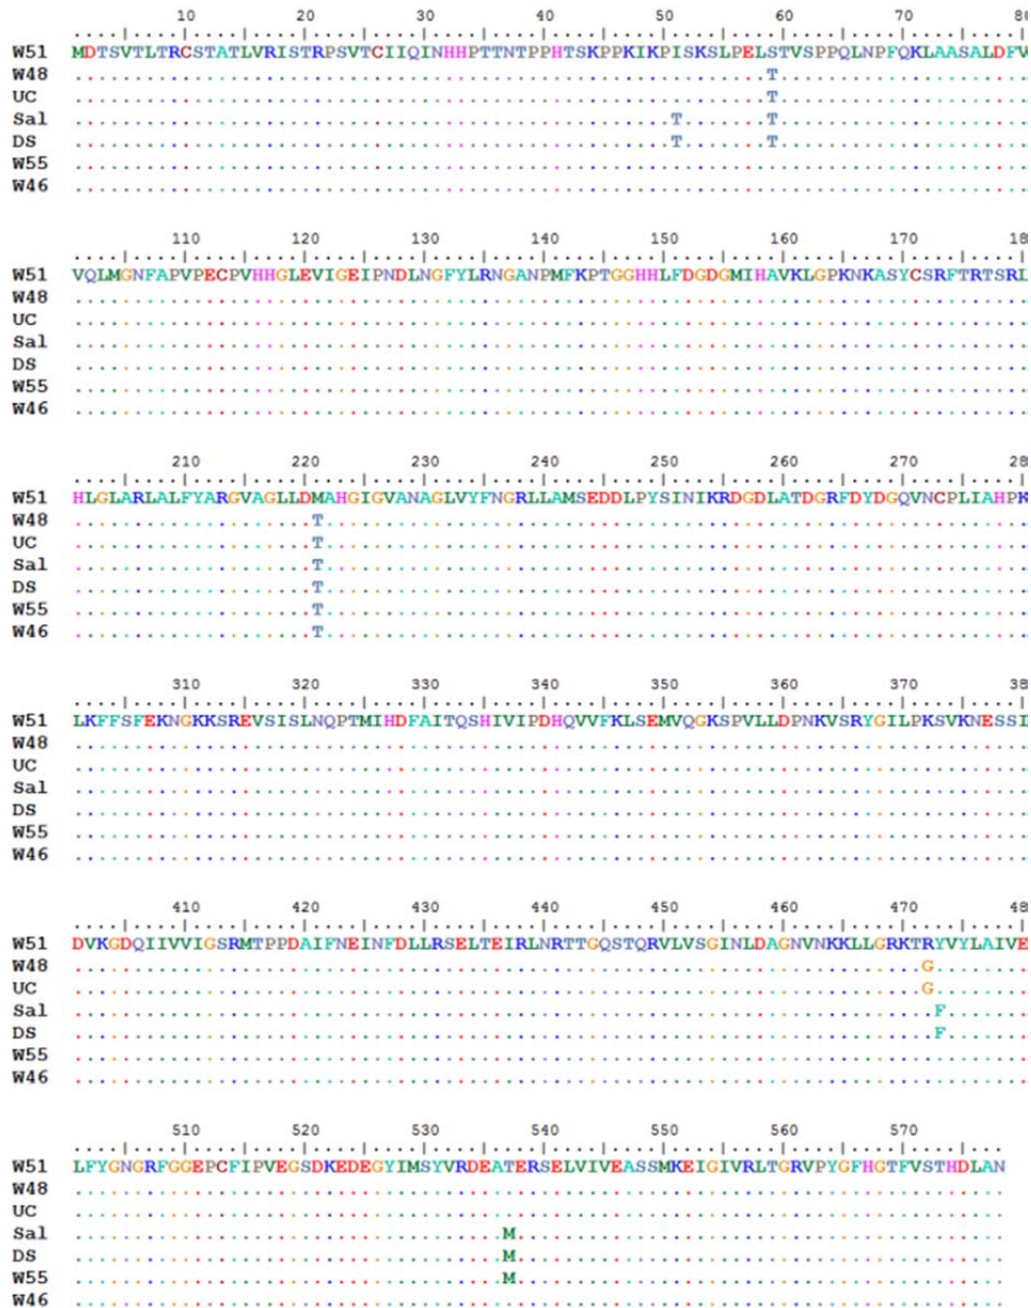

**Supplemental Figure 1.** Alignment of NCED4 Amino Acid Sequences from Different Lettuce Varieties.

NCED4 amino acid sequences are from thermotolerant genotypes (W51, W48 and UC) or thermosensitive genotypes (Sal, DS, W55 and W46).

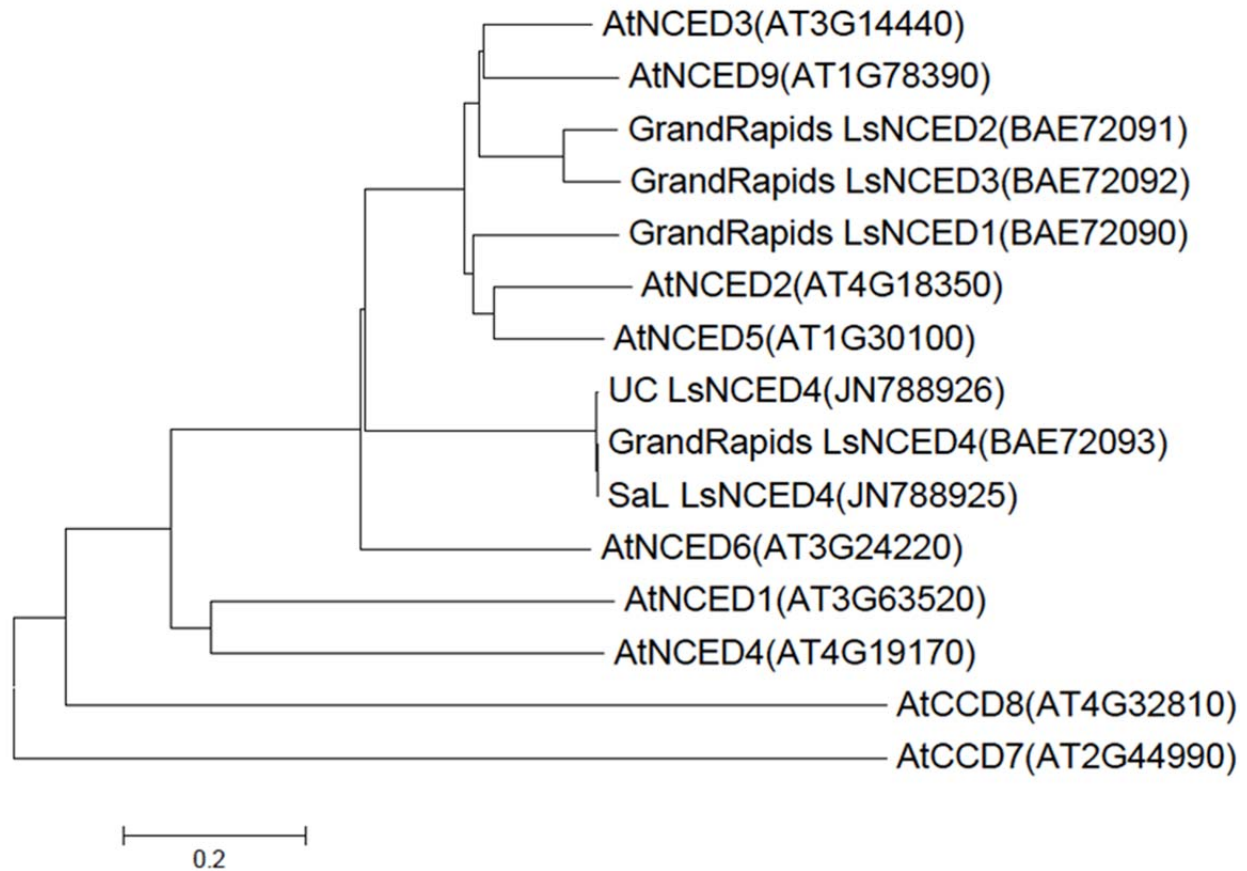

**Supplemental Figure 2.** Phylogenetic Analysis of NCED Proteins from Arabidopsis and Lettuce.

NCED proteins from *Arabidopsis* and from lettuce (Ls-NCED4 from Sal, UC and Grand Rapids, and Ls-NCED1, Ls-NCED2, Ls-NCED3 from Grand Rapids) were initially aligned with CLUSTAL-W and MEGA (Version 5.05, <http://www.megasoftware.net>) was used to conduct a phylogenetic analysis based on the Neighbor Joining method with 1000 bootstrap replications. The scale indicates the substitutions per site. The alignments used to generate this phylogeny are available in Supplemental Dataset 1.

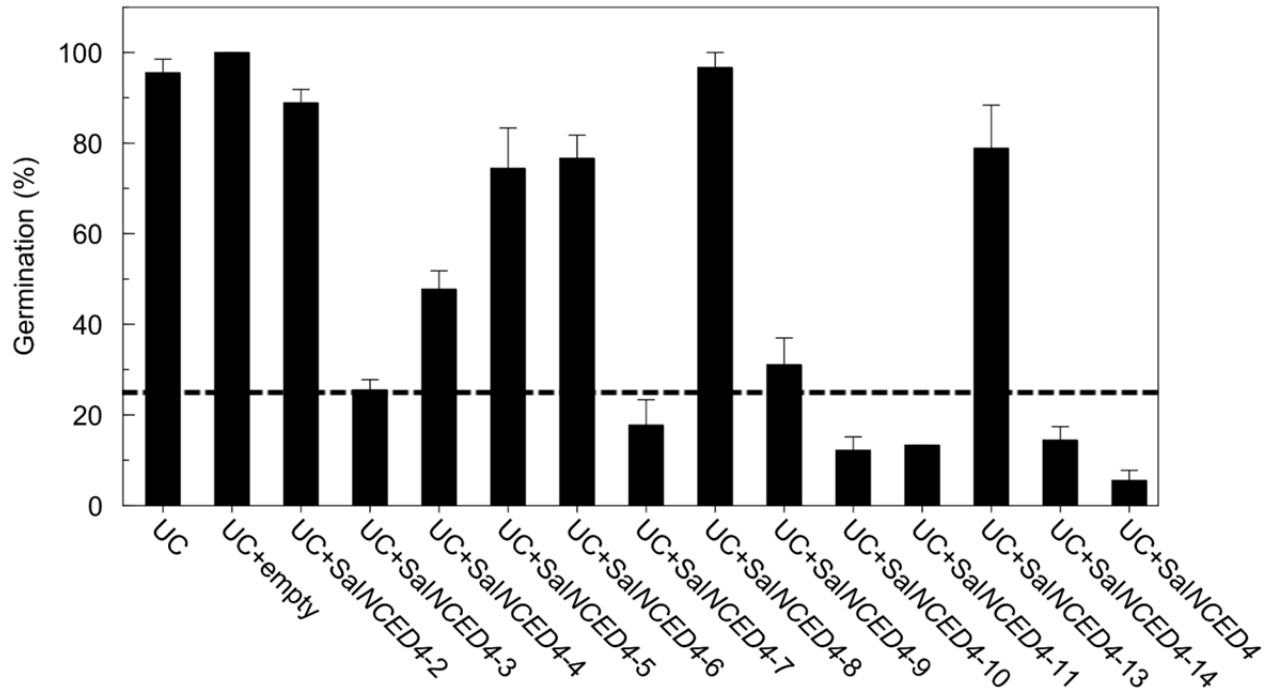

**Supplemental Figure 3.** Germination at High Temperature of Seeds of UC lines Transformed with ProSal:Sal-*NCED4*.

Germination of 12 independent heterozygous lines (UC+Sal*NCED4*-2 to -11, 13-14), UC wild type (UC), one control with empty vector (UC+empty), and one homozygous line derived from the heterozygous UC+Sal*NCED4*-3 line (UC+Sal*NCED4*) were examined at 35°C in the light for 3 d. If heterozygous seeds are segregating for a single dominant transgene, only 25% (horizontal dashed line) of UC+Sal*NCED4* seeds would be expected to germinate. Error bars denote SE ( $n \geq 3$ ).

**A**

```

*:. ***: : * . : : * : * * * * . . * : * : * : * : * * * * : * : .
VP14  MQGLAPPTSIVSIHRHLPARSRARASNSVRFSPRAVSSVPPAECLOAPFHKPVADLPAPSRKPAATAIVPGHAAAPRKAEGG   80
DS     MD-----TSVTLT-----RCSTATLVRISTR-----PSVTCIIQINHHPTTNTPPHTSKPPKIK-PTSKSLPELTTVS   62
MIS1   MD-----TSVTLT-----RCSTATLVRISTR-----PSVTCIIQINHHPTTNTPPHTSKPPKIK-PTSKSLPELTTVS   62
MIS2   MD-----TSVTLT-----RCSTATLVRISTR-----PSVTCIIQINHHPTTNTPPHTSKPPKIK-PTSKSLPELTTVS   62
STOP1  MD-----TSVTLT-----RCSTATLVRISTR-----PSVTCIIQINHHPTTNTPPHTSKPPKIK-PTSKSLPELTTVS   62
       1.....10.....20.....30.....40.....50.....60.....70.....80

*** * : * : * * * . * . * * * : * . * * * * : * * * * * * * * * * * * * * * * * * * * * * *
VP14  KKQLNFLQRAARAALDAFEFGFVANVLERPHGLPSTADPAVQIAGNFAPVGERPPVHELVPVSGRIPIFDIGVYARNGANP   160
DS     PPQLNPFQKLAASALDFVER--SLNVLENDQKRSHQVDPAVQLMGNFAPVPECPVHHGLEVIIGEIPNDLNGFYLRNGANP   140
MIS1   PPQLNPFQKLAASALDFVER--SLNVLENDQKRSHQVDPAVQLMGNFAPVPECPVHHGLEVIIGEIPNDLNGFYLRNGANP   140
MIS2   PPQLNPFQKLAASALDFVER--SLNVLENDQKRSHQVDPAVQLMGNFAPVPECPVHHGLEVIIGEIPNDLNGFYLRNGANP   140
STOP1  PPQLNPFQKLAASALDFVER--SLNVLENDQKRSHQVDPAVQLMGNFAPVPECPVHHGLEVIIGEIPNDLNGFYLRNGANP   140
       .....90.....100.....110.....120.....130.....140.....150.....160

* . . . . * * * * * * * * * * * * * * * * * * * * * * * * * * * * * * * * * * * * * * * * * * *
VP14  CSDPVAAGHHLFDGGMVHALRIRNGAAESYACRFTEARLRQERAIGRPVFPKAIIGELHGHSGIARLARLALFYARAACGLVD   240
DS     MFKPTGGHHLFDGGMHIVKLGPKNKASYCSRFRTRSRLLKQELSLGRPYFPKPIGELHGHGLARLARLALFYARGVAGLLD   220
MIS1   MFKPTGGHHLFDGGMHIVKLGPKNKASYCSRFRTRSRLLKQELSLGRPYFPKPIGELHGHGLARLARLALFYARGVAGLLD   220
MIS2   MFKPTGGHHLFDGGMHIVKLGPKNKASYCSRFRTRSRLLKQELSLGRPYFPKPIGELHGHGLARLARLALFYARGVAGLLD   220
STOP1  MFKPTGGHHLFDGGMHIVKLGPKNKASYCSRFRTRSRLLKQELSLGRPYFPKPIGELHGHGLARLARLALFYARGVAGLLD   220
       .....170.....180.....190.....200.....210.....220.....230.....240

. : * * * * * * * * * * * * * * * * * * * * * * * * * * * * * * * * * * * * * * * * * * *
VP14  PSAGTGVANAGLVYFNGRLLAMSEDDLPYHVRVADDGDLVTRVGRYDFDQGLGCAMIAPKLPDPATGELHLSYDVIKRPY   320
DS     TAHGIGVANAGLVYFNGRLLAMSEDDLPYSINIKRDGDLATDGRFDYDQVNCPLIAPKVPDPVTGELFSLSYDVLKPPY   300
MIS1   TAHGIGVANAGLVYFNGRLLAMSEDDLPYSINIKRDGDLATDGRFDYDQVNCPLIAPKVPDPVTGELFSLSYDVLKPPY   300
MIS2   TAHGIGVANAGLVYFNGRLLAMSEDDLPYSINIKRDGDLATDGRFDYDQVNCPLIAPKVPDPVTGELFSLSYDVLKPPY   300
STOP1  TAHGIGVANAGLVYFNGRLLAMSEDDLPYSINIKRDGDLATDGRFDYDQVNCPLIAPKVPDPVTGELFSLSYDVLKPPY   300
       .....250.....260.....270.....280.....290.....300.....310.....320

* * : * . * * : * . * : * * * * * * * * * * * . : * * * * * * * * * * * * * * * * * * * * * *
VP14  LKIFYRDPDGTSDDVEIPLEQPTMIDFAITENLVVVDHQQVVFKLQEMLRGGSPVVLDKKTSRFGVLPKHADASEM   400
DS     LKFFSFENKNGKKSREVSISLNQPTMIDFAITQSHIVIPDHQVVFKLSEMVQGKSPVLLDPNKNVSRYGILPKSVKNESI   380
MIS1   LKFFSFENKNGKKSREVSISLNQPTMIDFAITQSHIVIPDHQVVFKLSEMVQGKSPVLLDPNKNVSRYGILPKSVKNESI   380
MIS2   LKFFSFENKNGKKSREVSISLNQPTMIDFAITQSHIVIPDHQVVFKLSEMVQGKSPVLLDPNKNVSRYGILPKSVKNESI   380
STOP1  LKFFSFENKNGKKSREVSISLNQPTMIDFAITQSHIVIPDHQVVFKLSEMVQGKSPVLLDPNKNVSRYGILPKSVKNESI   380
       .....330.....340.....350.....360.....370.....380.....390.....400

VP14  ANVVDVDFCFHLWNAWEDEATG--EVVVIGSCMTPADSIFNESD-ERLESVLTETIRLDARTGRSTRRAVLPPSQQVNL   476
DS     QWIDVDFCFYHLWNAWEEVDVKGDQIIVVIGSRMTPFDIAIFNEINFDLLRSELTEIRLNRTTGQSTQORVLVSG---INL   457
MIS1   QWIDVDFCFYHLWNTWEEVDVKGDQIIVVIGSRMTPFDIAIFNEINFDLLRSELTEIRLNRTTGQSTQORVLVSG---INL   457
MIS2   QWIDVDFCFYHLWNAWEEVDVKGDQIIVVIGSRMTPFDIAIFNEINFDLLRSELTEIRLNRTTGQSTQORVLVSG---INL   457
STOP1  Q-----                               -----                               -----   381
       .....410.....420.....430.....440.....450.....460.....470.....480

VP14  EVGMVNRNLLGRETRYAYLVAEIPWPKVSGFAKVDLSTGELTKFEYGEGRFGGEPCFVPMDFAAAHRGEDDGYVLTfVH   556
DS     DAGNVNKKLLGRKTRFVYLAIVEPWPCKNGMAKVDLETGVVSKLFGNGRFGGEPCFIPVE---GSDKDEDEGYIMSIVR   533
MIS1   DAGNVNKKLLGRKTRFVYLAIVEPWPCKNGMAKVDLETGVVSKLFGNGRFGGEPCFIPVE---GSDKDEDEGYIMSIVR   533
MIS2   DAGNVNKKLLGRKTRFVYLAIVEPWPCKNGMAKVDLETGVVSKLFGNGRFGGEPCFIPVE---GSDKDEDEGYIMSIVR   533
STOP1  DAGNVNKKLLGRKTRFVYLAIVEPWPCKNGMAKVDLETGVVSKLFGNGRFGGEPCFIPVE---GSDKDEDEGYIMSIVR   533
       .....490.....500.....510.....520.....530.....540.....550.....560

VP14  DERAGTSELVNVNADMRLAATVQLSRVPFGFHTFTITGQELEAQAA   604
DS     DEAMERSELVIVEASSMKEIGIVRLTGRVYGFHTFTVSTHDLAN---   578
MIS1   DEAMERSELVIVEASSMKEIGIVRLTGRVYGFHTFTVSTHDLAN---   578
MIS2   DEAMERSELVIVEASSMKEIGIVRLTGRVYGFHTFTVSTHDLAN---   578
STOP1  DEAMERSELVIVEASSMKEIGIVRLTGRVYGFHTFTVSTHDLAN---   381
       .....570.....580.....590.....600.....

```

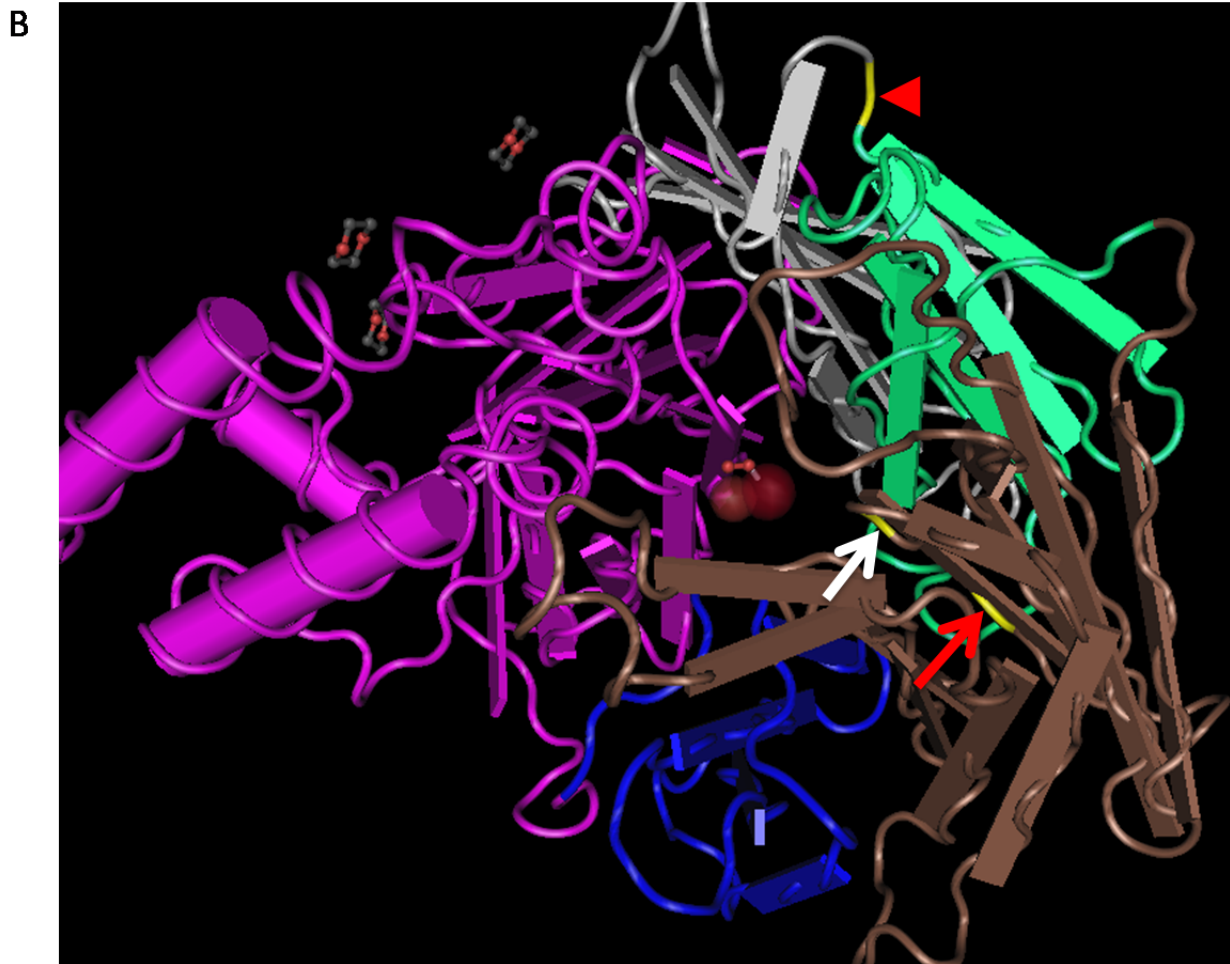

**Supplemental Figure 4.** Comparison of NCED4 Amino Acid Sequence and Structure to VP14 from Maize.

**(A)** Predicted protein amino acid sequences of Ls-NCED4 from three TILLING mutants (MIS1, MIS2 and STOP1) and their wild type DS were compared to those of VIVIPAROUS 14 (VP14, AAB62181.2) from maize (*Zea mays*). Arrow, the position at which there is a missense mutation in MIS1 (A to T); arrowhead, the position at which there is a missense mutation in MIS2 (G to E). The STOP1 mutation truncated the transcript just prior to the third of four conserved His residues (boxed) that are essential for coordinating an iron ion in the catalytic site of the enzyme.

**(B)** His-412 (white arrow), Ala-416 (red arrow) and Gly-523 (red arrowhead) are highlighted in bright yellow in the tertiary structure of VP14. Ala-416 was replaced with Thr in the MIS1 mutant and the STOP1 mutation truncated the coding region just prior to His-412, while the Gly-523 was replaced with Glu in MIS2. In maize, mutations near the conserved His residues reduced enzymatic activity (Messing et al., 2010).

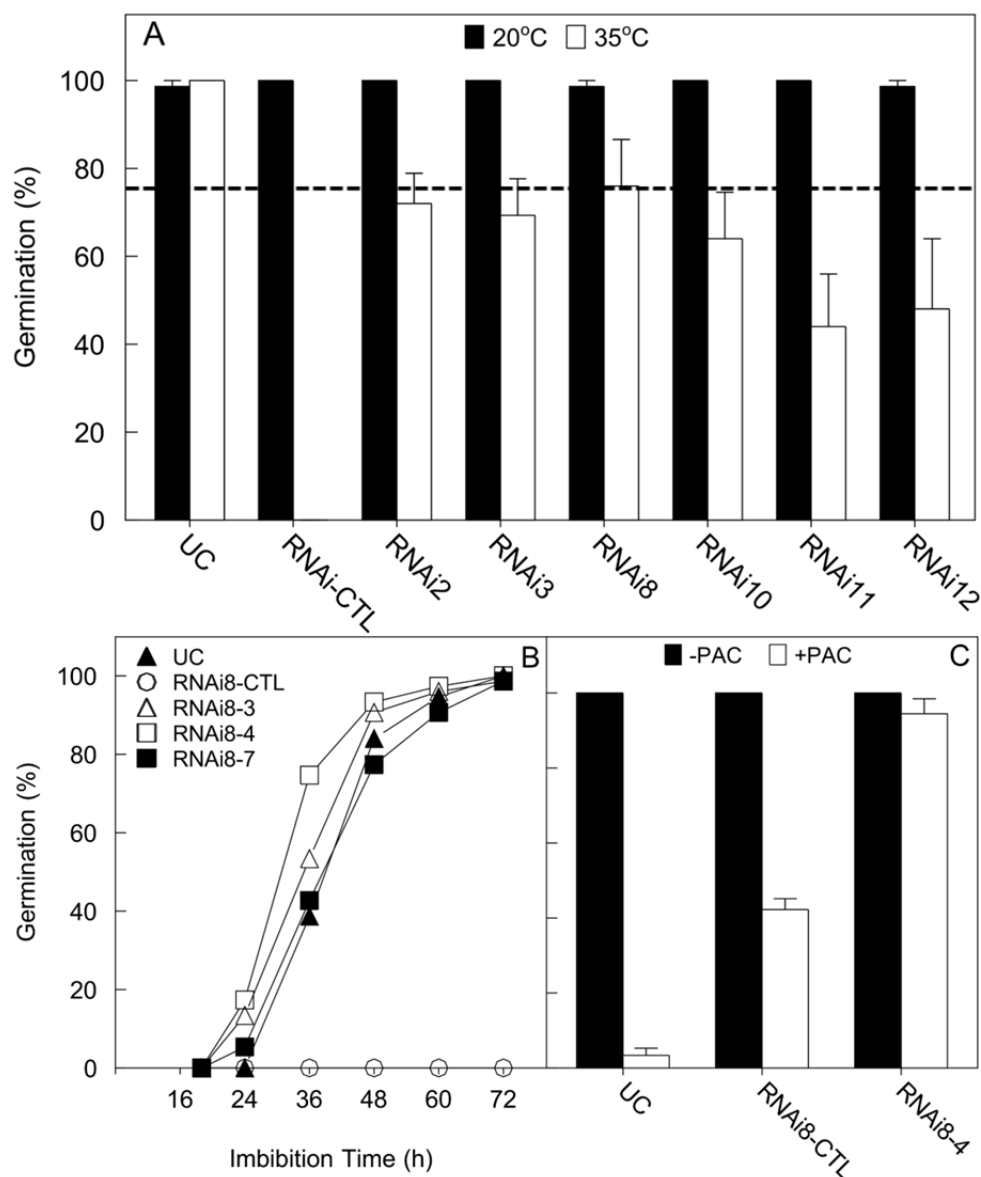

**Supplemental Figure 5.** Germination of Heterozygous and Homozygous RNAi-*NCED4* lines.

**(A)** Germination percentages of heterozygous RNAi seeds at 35°C in the light for 3 d. UC wild type, a control line transformed with empty vector (RNAi-CTL), and six independent transformed lines (RNAi2, 3, 8, 10, 11 and 12) are shown. As heterozygous RNAi seeds were segregating for the silencing insert, only 75% would be expected to germinate at 35°C (indicated by horizontal dashed line). Error bars denote SE ( $n \geq 3$ ).

**(B)** Time courses of seed germination of UC, a control line (RNAi8-CTL) and three homozygous RNAi lines (RNAi8-3, RNAi8-4, RNAi8-7) at 35°C in the light. Error bars denote SE ( $n \geq 3$ ).

**(C)** Germination of homozygous UC, RNAi control (RNAi8-CTL) and RNAi-*NCED4* (RNAi8-4) seeds in the presence of 200  $\mu$ M paclobutrazol (PAC). Seeds were treated at 4°C for 3 d and then incubated at 31°C for 48 h in the light. Error bars denote SE ( $n \geq 3$ ).

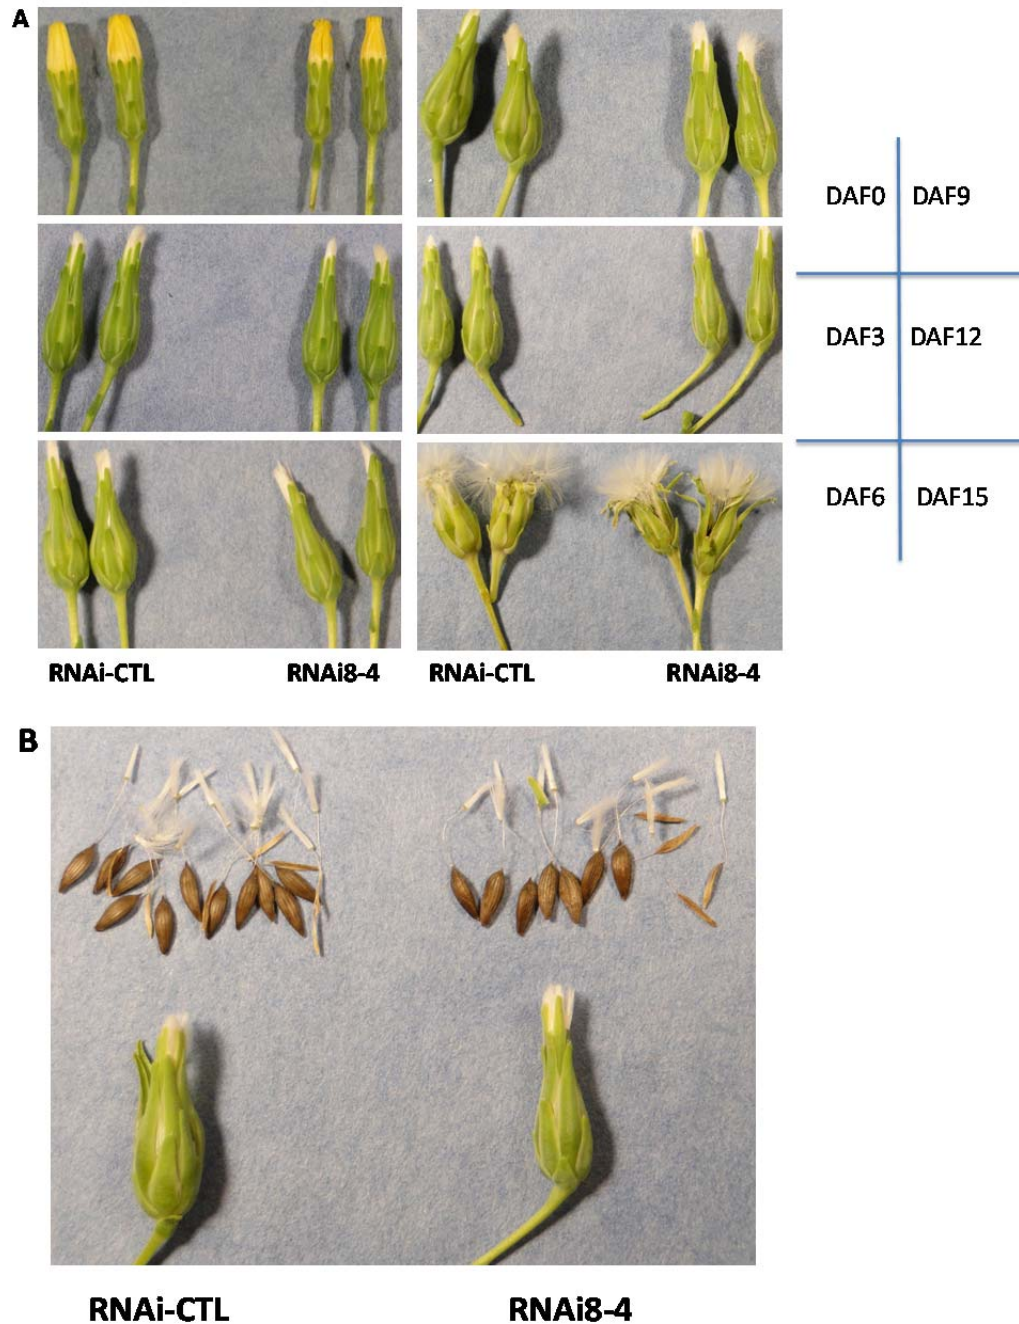

**Supplemental Figure 6.** Effect of *NCED4* Silencing on Inflorescence and Seed Development.

(A) Representative flower buds at six different developmental stages from RNAi8-4 (right in each panel) and RNAi8-CTL (left in each panel) plants are shown.

(B) Representative 9-days after flowering (DAF9) seeds and buds of RNAi control (left) and homozygous RNAi8-4 (right). Seeds from one bud are shown.

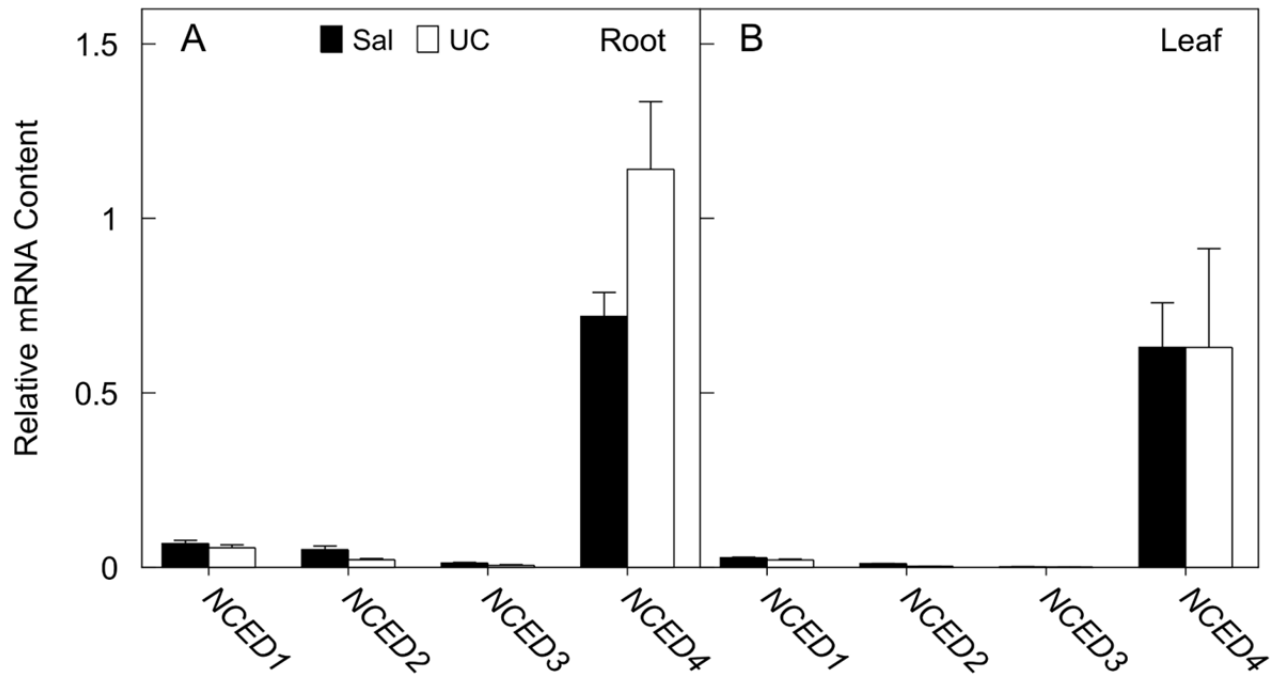

**Supplemental Figure 7.** Transcript Abundance of *NCED1-4* in Roots and Leaves of Sal and UC Plants.

Normalized mRNA contents of *NCED4* in roots (A) and leaves (B) of Sal and UC plants. Samples were collected from 5-week-old plants. Error bars denote SE (n= 3).



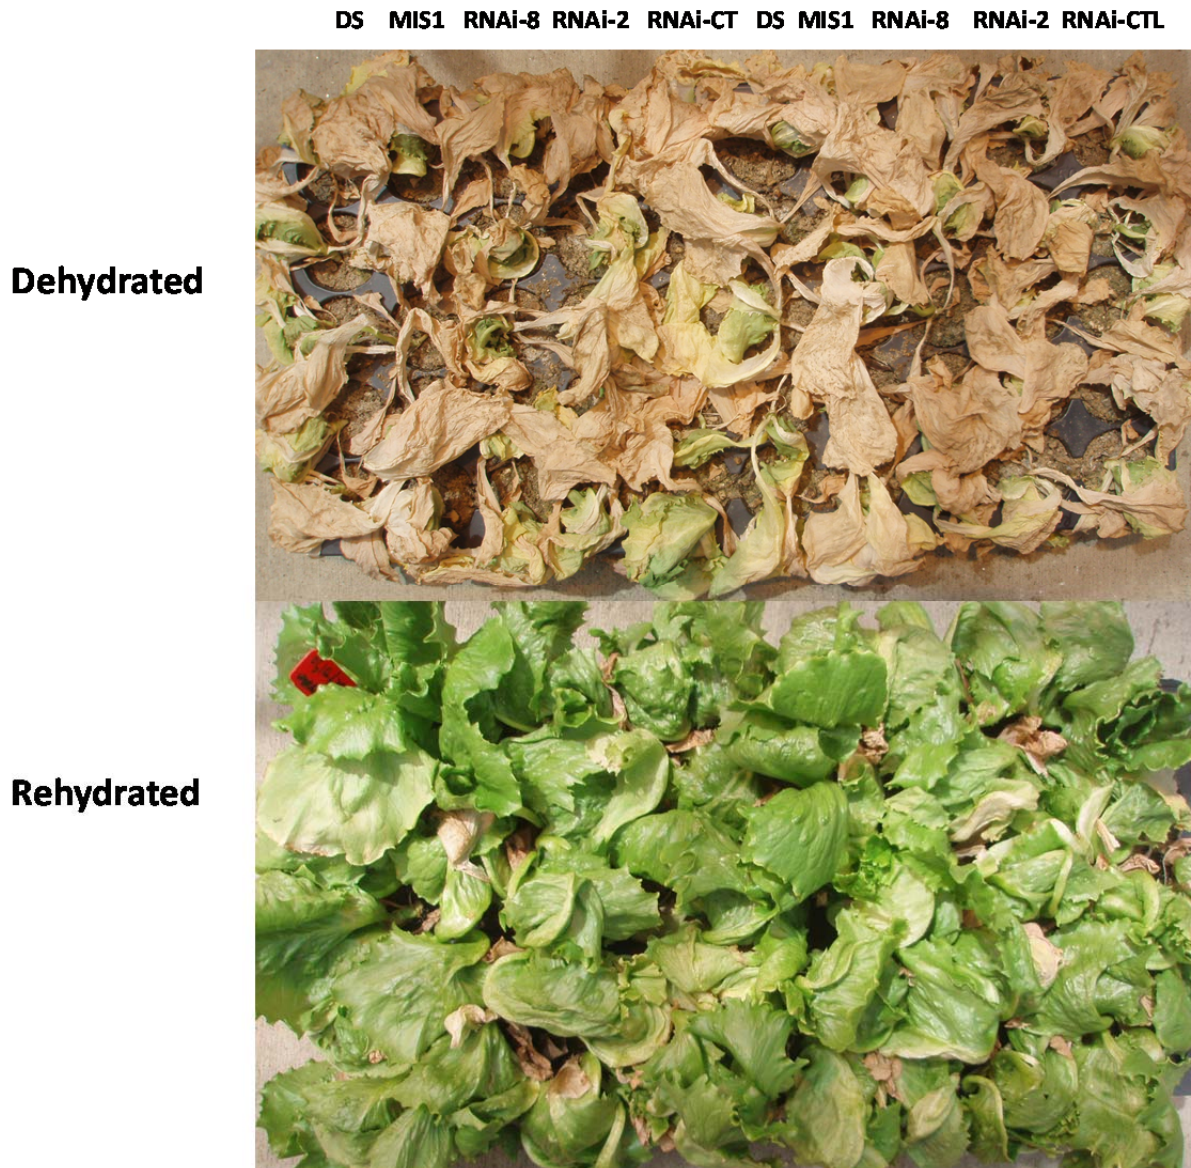

**Supplemental Figure 8.** Drought Tolerance Assay.

Water was withheld from five-week-old seedlings of DS, MIS1, RNAi-8, RNAi-2, RNAi-CTL (control line) for 10 days (upper panel) and the seedlings were then rewatered for 10 additional days (bottom panel). For each line, two rows of six seedlings were alternately planted in a 60-well tray. Three replicate trays were utilized for each treatment and a representative tray is shown. Watering and fertilization frequency and amount were automatically controlled. RNAi8 and RNAi2 seedlings were either heterozygous or homozygous for RNAi constructs based on germination following imbibition at 35°C for 24 h. No differences among genotypes were observed for either drought symptoms or recovery.

**Supplemental Table 1.** Primer Combinations Used for Isolation of *Ls-NCED4* and Its Promoters.

| Primer ID | Forward primer             | Reverse primer          | Purpose in this study              |
|-----------|----------------------------|-------------------------|------------------------------------|
| 328       | AACCTCCCACCACTATCTTCAA     | ATTTTCGTCATTTACACCACA   | Isolation of <i>NCED4</i> promoter |
| 391       | ATCGTATTTGTGTGGAGGAA       |                         | Isolation of <i>NCED4</i> promoter |
| 331       | TGCCAAATGTCAGGTTTTCA       | TGATAATGGTTTACATCCAACAA | Isolation of <i>NCED4</i> promoter |
| 332       | TCGAATATAACATTACAACGTCAAC  | TAGACGAATGTCCGCGTGT     | Isolation of <i>NCED4</i> promoter |
| 333       | TTCAAACGATTGAGATTATGCAG    | AAAGCCTTAAATCTTGTTCCAA  | Isolation of <i>NCED4</i> promoter |
| 334       | AAGGCAACATGCATACTTTCG      | CATGTAAGTATGGGCGTGT     | Isolation of <i>NCED4</i> promoter |
| 410       | CACAAGGACAATCTATGAGG       |                         | Isolation of <i>NCED4</i> promoter |
| 421       | CCATGGACCACCATTAAAGCTATCAC |                         | Isolation of <i>NCED4</i>          |
| 422       |                            | AGCTTAATTAGCCAAGTCATGGG | Isolation of <i>NCED4</i>          |
| 305       | GCCGGCCGTATTTCCCTAAG       | GAAACCATACGGCACTCTACCAG | Isolation of <i>NCED4</i>          |
| 241       | TGATCCAGCGGTTTCAGCTAA      | TTCACCAATTACCTCCAGACCAT | Isolation of <i>NCED4</i> from BAC |
| 449       | ATGACTGGGCACAACAGACAAT     | GATACCGTAAAGCACGAGGAAG  | <i>nptII</i> -specific             |
| 450       | ATGAAAAAGCCTGAACTCACCG     | CTGCTCCATACAAGCCAACCAC  | hygromycin-specific                |

**Supplemental Table 2.** Lettuce Genes and Primer Combinations Used for qRT-PCR.

| Gene Name      | Accession ID | Forward primer            | Reverse primer            | Arabidopsis homologue locus |
|----------------|--------------|---------------------------|---------------------------|-----------------------------|
| <i>18S1</i>    | DW138800     | GCATGAGTGGTGTGGTTTGT      | GAGGTAAGAACGCATGGAAGTTG   | AT3G41768                   |
| <i>UBQ</i>     | DW144476     | TCTTAGATCACCGTCCCATCGT    | TCTGAGATTGTCCGAGGATATGAG  | AT5G25760                   |
| <i>PP2A2</i>   | DW137232     | TTGACGGAATCGGAGGTAATA     | CCGGCTGCACATTCCATT        | AT1G10430                   |
| <i>NCED4</i>   | AB120110     | TGATCCAGCGGTTTCAGCTAA     | TTCACCAATTACCTCCAGACCAT   | AT3G24220                   |
| <i>NCED1</i>   | AB120107     | CGCAATCACCGAGAACTTTGT     | GGCGATCCTCTTTTATCATTTTC   | AT1G30100                   |
| <i>NCED2</i>   | AB120108     | TCGACTCTTTGTGCACTTCATACTC | CAACGGGACAAGTTGAGGTTTTTA  | AT3G14440                   |
| <i>NCED3</i>   | AB120109     | AGCTCAGCTTGGTTCCTGTTATA   | CTTCACAAACTGGCTGAAAACGTAT | AT3G14440                   |
| <i>ZEP1</i>    | AB120106     | GGGCTACACTTGTTACTGTTGGATA | GCCCCAAGAACACCCGATA       | AT5G67030                   |
| <i>ABA8ox4</i> | AB235920     | CCCTCAACCTCACAAATTCGA     | CCATTCCCGAACGGCATATA      | AT2G29090                   |
| <i>ABI3</i>    | DY964887     | ACGCAATGCTTGGTGATGAG      | AAGGCGGAGATGGCCAGTA       | AT3G24650                   |
| <i>ABI5</i>    | BU007567     | CGGACGGAAGCGGATAAT        | TTCTAGCTCGAGACCTTGACG     | AT2G36270                   |
| <i>SNF4</i>    | DY978381     | GGATTGTATGGAGGTGTTTAGCAAA | CCGGATACGTTTTCCATGGA      | AT1G15330                   |
| <i>GA3ox1</i>  | AB012205     | GGTGACCTCCTCCACATATTATCC  | TGTTGGGTTTCGGTTCACCAT     | AT1G80340                   |
| <i>GA20ox1</i> | AB012203     | GAAAGAGACGCTATCTTTCCGATT  | GCCCATTGTGTTCTCGAAGTAGT   | AT4G25420                   |
| <i>GA2ox1</i>  | AB031206     | TCGTTAACCATGGAGTTCCC      | CTCAAGAATTTACACACGCCA     | AT1G30040                   |
| <i>RGL2</i>    | DY960761     | CCAATCAAGCCATCCTCGAA      | ATCCCTTGGTTCAAGCTGAAATC   | AT3G03450                   |
| <i>ACS1</i>    | AF380836     | GACTGTGGCGTTTTGCTTAGCTA   | AAGTCACGGTCAAATCCTGGATAAT | AT4G11280                   |
| <i>ACO2</i>    | AB158346     | AGCGGTCTTCAGCTTCTCAAAG    | CGAGATTGATGACGATGGAATG    | AT1G05010                   |
| <i>LEA</i>     | DW129442     | ACGTAAAGGAGACGGAGGAA      | CCTCACCATCATCACGCT        | AT2G36640                   |
| <i>SPT</i>     | DW124777     | GCGGATCTATACGGAACCAA      | TGGAACCAAGGTCTGCAAAG      | AT4G36930                   |
| <i>PKL</i>     | DW131866     | CAGCAGCAGCTTGTGATGAT      | TCAACTGATTCAACCGCATT      | AT2G25170                   |
| <i>DOG1</i>    | DW045365     | CAAAAAAATCGTCTCCCACTT     | CAAAAAGGAAGGCCATCGT       | AT5G45830                   |

**Supplemental Table 3.** Accession Numbers for Sequences Used in This Study

| <b>Gene</b>                           | <b>Accession ID</b> |
|---------------------------------------|---------------------|
| <i>Zm-VP14</i>                        | AAB62181            |
| <i>At-NCED1</i>                       | At3g63520           |
| <i>At-NCED2</i>                       | At4g18350           |
| <i>At-NCED3</i>                       | At3g14440           |
| <i>At-NCED4</i>                       | At4g19170           |
| <i>At-NCED5</i>                       | At1g30100           |
| <i>At-NCED6</i>                       | At3g24220           |
| <i>At-NCED9</i>                       | At1g78390           |
| <i>At-CCD7</i>                        | At2g44990           |
| <i>At-CCD8</i>                        | At4g32810           |
| cv. Grand Rapids <i>NCED1</i>         | BAE72090            |
| cv. Grand Rapids <i>NCED2</i>         | BAE72091            |
| cv. Grand Rapids <i>NCED3</i>         | BAE72092            |
| cv. Grand Rapids <i>NCED4</i>         | BAE72093            |
| cvs. Sal and DS <i>NCED4</i>          | JN788925            |
| UC and W48 <i>NCED4</i>               | JN788926            |
| W46 <i>NCED4</i>                      | JN788927            |
| W55 <i>NCED4</i>                      | JN788928            |
| W51 <i>NCED4</i>                      | JN788929            |
| cv. Diana BAC containing <i>NCED4</i> | KC676791            |
